# Supplementary material
Source: publisher figshare collection journal article supplement (https://acs.figshare.com/ndownloader/files/4664002)
Supplement: Supplementary file 1 [file 4664002]

# Supplemental Table

1

## Quantitation of N-linked glycans from murine embryonic stem cells and embroid bodies

| m/z                 | Charge state                                     | Glycan structure                                                                    | EB( <sup>13</sup> C)/ES(D)<br>Run 1 | EB( <sup>13</sup> C)/ES(D)<br>Run 2 | EB( <sup>13</sup> C)/ES(D)<br>Run 3 | EB( <sup>13</sup> C)/ES(D)<br>%SDEV |
|---------------------|--------------------------------------------------|-------------------------------------------------------------------------------------|-------------------------------------|-------------------------------------|-------------------------------------|-------------------------------------|
| 1188.65             | [M+1Na] <sup>1+</sup>                            |    | 0.18                                | -0.32                               | -0.04                               | 24.96                               |
| 1395.75             | [M+1Na] <sup>1+</sup>                            |    | 0.60                                | 0.17                                | 0.10                                | 27.23                               |
| 812.93,<br>1602.86  | [M+2Na] <sup>2+</sup> ,<br>[M+1Na] <sup>1+</sup> |    | 0.16                                | -0.17                               | 0.01                                | 16.48                               |
| 916.48,<br>1809.97  | [M+2Na] <sup>2+</sup> ,<br>[M+1Na] <sup>1+</sup> |    | -0.56                               | -1.03                               | -0.80                               | 23.61                               |
| 1020.04             | [M+2Na] <sup>2+</sup>                            |    | -0.27                               | -0.74                               | -0.44                               | 23.99                               |
| 756.73,<br>1123.59  | [M+3Na] <sup>3+</sup> ,<br>[M+2Na] <sup>2+</sup> |   | -1.54                               | -1.32                               | -1.12                               | 21.35                               |
| 825.76,<br>1227.15  | [M+3Na] <sup>3+</sup> ,<br>[M+2Na] <sup>2+</sup> |  | -0.47                               | -0.93                               | -0.41                               | 28.12                               |
| 1330.71             | [M+2Na] <sup>2+</sup>                            |  | -1.29                               | -1.53                               | -1.16                               | 18.77                               |
| 1365.75             | [M+1Na] <sup>1+</sup>                            |  | 0.93                                | 0.37                                | 0.50                                | 29.42                               |
| 1572.85             | [M+1Na] <sup>1+</sup>                            |  | 0.19                                | 0.08                                | 0.25                                | 8.58                                |
| 1779.96             | [M+1Na] <sup>1+</sup>                            |  | -0.32                               | -0.64                               | -0.34                               | 17.80                               |
| 1005.03,<br>1987.07 | [M+2Na] <sup>2+</sup> ,<br>[M+1Na] <sup>1+</sup> |  | 0.08                                | -0.07                               | 0.32                                | 19.69                               |
| 942.51              | [M+2Na] <sup>2+</sup>                            |  | -0.06                               | 0.05                                | -0.18                               | 11.60                               |
| 957.51              | [M+2Na] <sup>2+</sup>                            |  | 0.15                                | 0.51                                | -0.06                               | 29.03                               |
| 1046.06             | [M+2Na] <sup>2+</sup>                            |  | -0.38                               | -0.64                               | -0.36                               | 15.75                               |

| Mass    | Formula                      | Structure | $\Delta_{\text{H}}^{\text{H}}/\text{eV}$ | $\Delta_{\text{H}}^{\text{H}}/\text{eV}$ | $\Delta_{\text{H}}^{\text{H}}/\text{eV}$ | Relative Abundance (%) |
|---------|------------------------------|-----------|------------------------------------------|------------------------------------------|------------------------------------------|------------------------|
| 1046.06 | $[\text{M}+2\text{Na}]^{2+}$ |           | -0.38                                    | -0.64                                    | -0.36                                    | 15.75                  |
| 1061.07 | $[\text{M}+2\text{Na}]^{2+}$ |           | -0.74                                    | -1.27                                    | -0.77                                    | 29.72                  |
| 1149.62 | $[\text{M}+2\text{Na}]^{2+}$ |           | -0.57                                    | -0.99                                    | -0.69                                    | 21.67                  |
| 978.02  | $[\text{M}+2\text{Na}]^{2+}$ |           | -0.90                                    | -0.95                                    | -0.95                                    | 2.77                   |
| 1066.57 | $[\text{M}+2\text{Na}]^{2+}$ |           | -0.84                                    | -1.30                                    | -1.21                                    | 24.12                  |
| 1081.58 | $[\text{M}+2\text{Na}]^{2+}$ |           | -0.86                                    | -1.00                                    | -1.00                                    | 7.90                   |
| 1170.13 | $[\text{M}+2\text{Na}]^{2+}$ |           | -0.94                                    | -1.27                                    | -1.18                                    | 17.11                  |
| 1258.68 | $[\text{M}+2\text{Na}]^{2+}$ |           | -0.91                                    | -1.15                                    | -1.00                                    | 12.35                  |
| 1185.13 | $[\text{M}+2\text{Na}]^{2+}$ |           | 0.37                                     | 0.41                                     | 0.39                                     | 2.00                   |
| 1273.68 | $[\text{M}+2\text{Na}]^{2+}$ |           | -1.12                                    | -0.94                                    | -0.80                                    | 16.15                  |
| 1362.24 | $[\text{M}+2\text{Na}]^{2+}$ |           | -1.61                                    | -1.86                                    | -1.49                                    | 18.91                  |
| 1264.67 | $[\text{M}+2\text{Na}]^{2+}$ |           | -0.68                                    | -0.89                                    | -0.50                                    | 19.11                  |
| 1368.23 | $[\text{M}+2\text{Na}]^{2+}$ |           | -0.84                                    | -1.18                                    | -1.09                                    | 17.90                  |
| 1427.26 | $[\text{M}+2\text{Na}]^{2+}$ |           | 0.29                                     | 0.14                                     | -0.03                                    | 15.80                  |

All expression ratios calculated as  $\text{Log}_2$ ; %SDEV calculated as the relative percent standard deviation taken from the average expression ratio.

### **Supplemental Figure 1**

Correlation between calculated and expected ratios for quantitation of two fetuin glycans by QUIBL. In each experiment the  $^{13}\text{CH}_3$  and  $^{12}\text{CH}_2\text{D}$  labeled glycans were mixed together at the ratios 10:1, 8:3, 1:1, 3:8, and 1:10 ( $^{13}\text{CH}_3$  :  $^{12}\text{CH}_2\text{D}$ ) and analyzed by FTICR. The calculated expression ratios were determined by comparing the sum of the peak intensities for all isotopes between  $^{13}\text{CH}_3$  and  $^{12}\text{CH}_2\text{D}$  labeled precursor ions for each glycan. For both glycans a linear correlation was observed between the calculated and the expected ratios with a minimum  $R^2$  of 0.9983.

### **Supplemental Figure 2**

QUIBL analysis of a differently labeled fetuin glycan mixed at five different ratios. Two fetuin glycan mixtures were permethylated in either  $^{13}\text{CH}_3\text{I}$  or  $^{12}\text{CH}_2\text{DI}$ . The two differentially labeled glycan mixtures were then mixed together at the ratios 10:1, 8:3, 1:1, 3:8, and 1:10 ( $^{13}\text{CH}_3$  :  $^{12}\text{CH}_2\text{D}$ ) and analyzed by FTICR (a,b,c,d,e). Accurate quantitation was achieved at all ratios over two orders of magnitude.

### **Supplemental Figure 3**

$\text{MS}^n$  analysis of two di-fucosylated (Lewis X type) N-linked glycans from ES and EB cells. (a, b)  $\text{MS}^2$  of the two Lewis X type N-linked glycans. (c)  $\text{MS}^3$  of the fragment ion at 1846.00 m/z from  $\text{MS}^2$  of the glycan in shown in (a). (d)  $\text{MS}^3$  of the fragment ion at 1126.18 m/z from  $\text{MS}^2$  of the glycan in shown in (b).

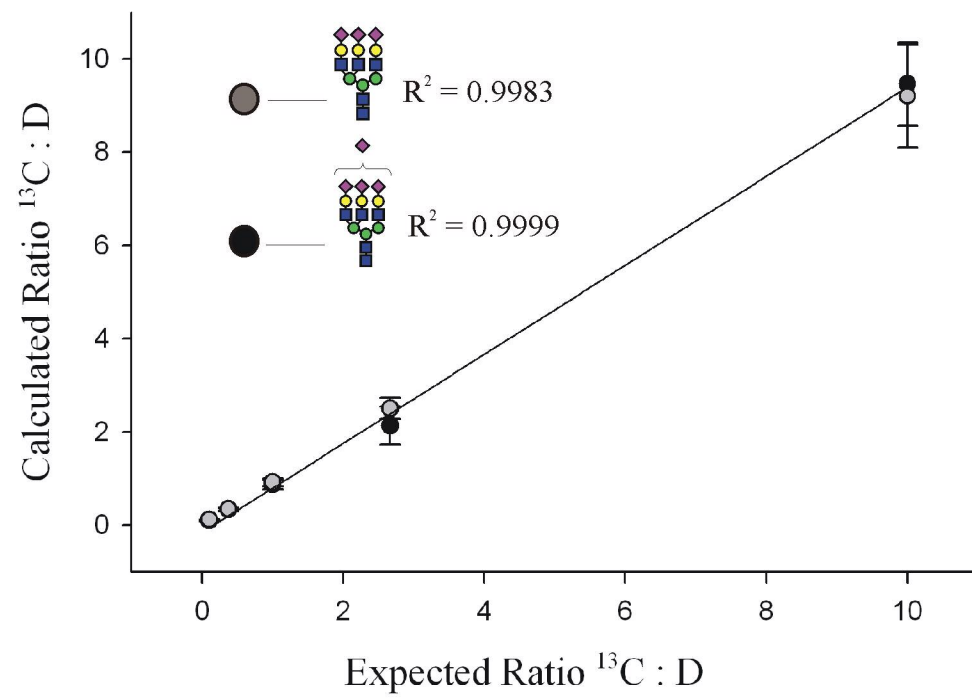

Supplemental Figure 1.

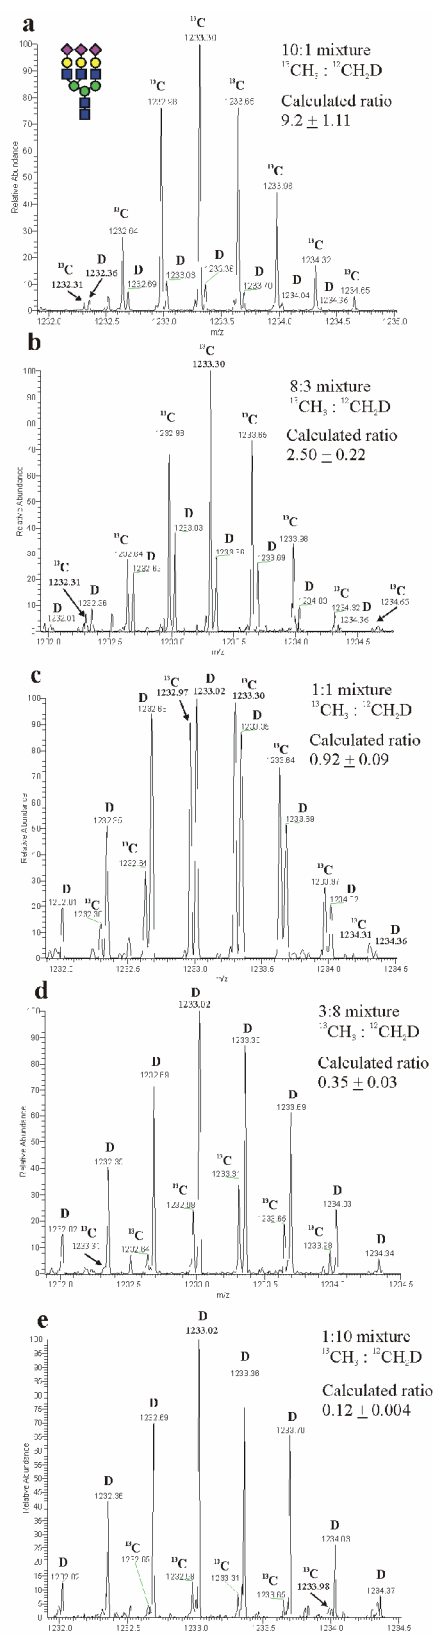

Supplemental Figure 2.
